# Supplementary material
Source: HighWire-hosted journal article supplement (https://rmdopen.bmj.com/content/9/2/e003120)
Supplement: inline-supplementary-material-3 [file inline-supplementary-material-3.pdf]

*Supplement Table B:***Table B. Results of the latent Dirichlet allocation (LDA) model.** The table below shows the topics retrieved from the LDA model with the respective "word clouds".

| Topic                                        | Meaning of Topic                                                                                                                       | Word Clouds                                                                  |
|----------------------------------------------|----------------------------------------------------------------------------------------------------------------------------------------|------------------------------------------------------------------------------|
| <b>Positive Feedback on the ESOR Courses</b> |                                                                                                                                        |                                                                              |
| Topic 1                                      | <b>The online courses provide in-depth and up-to-date knowledge.</b>                                                                   | good, online, information, knowledge, basic, flexible, comprehensive, differ |
| Topic 2                                      | <b>Online courses offer time flexibility and the possibility to complete the course at your own pace.</b>                              | course, time, complete, pace, profession, take, attend, clear                |
| <b>Negative Feedback on the ESOR Courses</b> |                                                                                                                                        |                                                                              |
| Topic 1                                      | <b>The online course should have a clear benefit for the respective professional groups, even if it is a multidisciplinary course.</b> | course, focus, nurse, specific, missed, translated, professions              |
| Topic 2                                      | <b>English is challenging in classes, especially when you want to ask questions.</b>                                                   | English, even, much, test, possible, Dutch, questions                        |
| Topic 3                                      | <b>English is challenging, especially in the exams.</b>                                                                                | language, time, offer, also, difficult, exam, little                         |
