# Supplementary material
Source: HighWire-hosted journal article supplement (https://rmdopen.bmj.com/content/9/2/e003120)
Supplement: inline-supplementary-material-5 [file inline-supplementary-material-5.pdf]

## Supplement Table E to Table I

**Table E: Characteristics of HPR who participated in the survey.** Data are presented separately for the three largest professional groups (nurses, physiotherapists, and occupational therapists). No mandatory questions were included in the survey. To clarify the number of responses per question, the number of valid answers is reported.

| Variables                                                                                                                              | All HPR                                         | Nurses                                          | Physiotherapists                                | Occupational therapists                         | Other Professions                               | p-value |
|----------------------------------------------------------------------------------------------------------------------------------------|-------------------------------------------------|-------------------------------------------------|-------------------------------------------------|-------------------------------------------------|-------------------------------------------------|---------|
| <b>Gender</b>                                                                                                                          | 998                                             | 250                                             | 350                                             | 188                                             | 210                                             | <0.001  |
| Female, n(%)                                                                                                                           | 762 (76.4%)                                     | 227 (90.8%)                                     | 211 (60.3%)                                     | 167 (88.8%)                                     | 157 (74.8%)                                     |         |
| Male, n(%)                                                                                                                             | 215 (21.5%)                                     | 15 (6.0%)                                       | 136 (38.9%)                                     | 20 (10.6%)                                      | 44 (21.0%)                                      |         |
| Prefer not to answer, n(%)                                                                                                             | 15 (1.5%)                                       | 6 (2.4%)                                        | 1 (0.3%)                                        | 1 (0.5%)                                        | 7 (3.3%)                                        |         |
| Prefer to self-describe, n(%)                                                                                                          | 6 (0.6%)                                        | 2 (0.8%)                                        | 2 (0.6%)                                        | 0                                               | 2 (1.0%)                                        |         |
| <b>Age in years, mean (<math>\pm</math>SD); median [IQR]</b>                                                                           | 40.53 ( $\pm$ 11.54);<br>40.00 [30.00 to 50.00] | 45.96 ( $\pm$ 10.06);<br>47.00 [39.00 to 54.00] | 36.35 ( $\pm$ 11.25);<br>33.00 [28.00 to 43.00] | 39.02 ( $\pm$ 10.90);<br>39.00 [29.75 to 47.00] | 42.37 ( $\pm$ 11.25);<br>42.00 [34.00 to 51.00] | <0.001  |
| <b>Work/research experience in the field of RMDs in years, scale of 1 to 5 mean (<math>\pm</math>SD); median [IQR]</b>                 | 10.25 ( $\pm$ 9.71);<br>8.00 [2.00 to 15.00]    | 10.60 ( $\pm$ 48.86);<br>10.00 [3.00 to 16.00]  | 8.96 ( $\pm$ 9.57);<br>5.00 [2.00 to 12.00]     | 10.60 ( $\pm$ 9.41);<br>8.00 [2.25 to 17.00]    | 11.98 ( $\pm$ 11.14);<br>10.00 [3.00 to 19.50]  | 0.020   |
| <b>Clinical patient care in hours per week, scale of 1 to 5 mean (<math>\pm</math>SD); median [IQR]</b>                                | 21.23 ( $\pm$ 13.34);<br>22.00 [10.00 to 32.00] | 21.50 ( $\pm$ 12.85);<br>24.00 [10.00 to 32.00] | 23.57 ( $\pm$ 13.66);<br>25.00 [10.00 to 36.00] | 18.98 ( $\pm$ 13.05);<br>20.00 [8.00 to 30.00]  | 17.99 ( $\pm$ 12.77);<br>19.00 [6.00 to 30.00]  | <0.001  |
| <b>Research/Education in hours per week, scale of 1 to 5 mean (<math>\pm</math>SD); median [IQR]</b>                                   | 11.03 ( $\pm$ 27.20);<br>5.00 [1.00 to 11.50]   | 8.55 ( $\pm$ 13.36);<br>3.00 [1.00 to 10.00]    | 13.89 ( $\pm$ 38.85);<br>5.00 [2.00 to 16.00]   | 6.49 ( $\pm$ 9.17);<br>3.50 [1.00 to 8.00]      | 12.28 ( $\pm$ 16.83);<br>5.00 [1.50 to 16.50]   | 0.068   |
| <b>Other such as Organisational tasks in hours per week, mean (<math>\pm</math>SD); median [IQR]</b>                                   | 7.79 ( $\pm$ 8.30);<br>5.00 [2.00 to 10.00]     | 8.37 ( $\pm$ 9.52);<br>5.00 [2.00 to 10.00]     | 6.73 ( $\pm$ 7.18);<br>5.00 [2.00 to 10.00]     | 6.94 ( $\pm$ 8.29);<br>5.00 [1.00 to 10.00]     | 9.98 ( $\pm$ 8.24);<br>8.00 [5.00 to 13.00]     | 0.006   |
| <b>Professional/formal training and/or education over the past 12 months in days per year, mean (<math>\pm</math>SD); median [IQR]</b> | 8.78 ( $\pm$ 10.06);<br>5.00 [2.00 to 10.00]    | 6.52 ( $\pm$ 9.19);<br>3.00 [0.00 to 10.00]     | 11.18 ( $\pm$ 11.67);<br>7.00 [2.75 to 18.50]   | 8.50 ( $\pm$ 9.26);<br>5.00 [2.00 to 10.00]     | 7.81 ( $\pm$ 7.87);<br>6.00 [2.50 to 10.00]     | <0.001  |
| <b>Planned but cancelled training/education due to corona measures in days per year, mean (<math>\pm</math>SD); median [IQR]</b>       | 10.22 ( $\pm$ 12.52);<br>6.00 [3.00 to 10.00]   | 10.13 ( $\pm$ 12.03);<br>6.00 [3.00 to 10.00]   | 11.03 ( $\pm$ 14.05);<br>5.00 [4.00 to 12.00]   | 14.39 ( $\pm$ 15.53);<br>10.00 [5.00 to 16.00]  | 5.67 ( $\pm$ 5.25);<br>5.00 [2.00 to 8.00]      | 0.097   |
| <b>Highest professional/academic qualification</b>                                                                                     | 985                                             | 247                                             | 350                                             | 188                                             | 200                                             | <0.001  |
| Certificate/Diploma, not equalling a Bachelor's degree, n(%)                                                                           | 126 (12.8%)                                     | 42 (17.0%)                                      | 17 (4.9%)                                       | 15 (8.0%)                                       | 52 (26.0%)                                      |         |
| Bachelor's degree or similar, n(%)                                                                                                     | 524 (53.2%)                                     | 139 (56.3%)                                     | 204 (58.3%)                                     | 127 (67.6%)                                     | 54 (27.0%)                                      |         |
| Master's degree or similar, n(%)                                                                                                       | 245 (24.9%)                                     | 58 (23.5%)                                      | 98 (28.0%)                                      | 35 (18.6%)                                      | 54 (27.0%)                                      |         |

|                                                                        |             |             |             |             |            |        |
|------------------------------------------------------------------------|-------------|-------------|-------------|-------------|------------|--------|
| <b>PhD, n(%)</b>                                                       | 90 (9.1%)   | 8 (3.2%)    | 31 (8.9%)   | 11 (5.9%)   | 40 (20.0%) |        |
| <b>Current skills: understanding spoken English</b>                    | 783         | 210         | 294         | 145         | 134        | <0.001 |
| <b>Basic, n(%)</b>                                                     | 320 (40.9%) | 110 (52.4%) | 97 (33.0%)  | 49 (33.8%)  | 64 (47.8%) |        |
| <b>Advanced, n(%)</b>                                                  | 407 (52.0%) | 90 (42.9%)  | 185 (62.9%) | 78 (53.8%)  | 54 (40.3%) |        |
| <b>Native, n(%)</b>                                                    | 56 (7.2%)   | 10 (4.8%)   | 12 (4.1%)   | 18 (12.4%)  | 16 (11.9%) |        |
| <b>Current skills: understanding written English</b>                   | 779         | 207         | 295         | 142         | 135        | <0.001 |
| <b>Basic, n(%)</b>                                                     | 272 (34.9%) | 106 (51.2%) | 67 (22.7%)  | 45 (31.7%)  | 54 (40.0%) |        |
| <b>Advanced, n(%)</b>                                                  | 443 (56.9%) | 92 (44.4%)  | 213 (72.2%) | 76 (53.5%)  | 62 (45.9%) |        |
| <b>Native, n(%)</b>                                                    | 64 (8.2%)   | 9 (4.3%)    | 15 (5.1%)   | 21 (14.8%)  | 19 (14.1%) |        |
| <b>Current skills: speaking English</b>                                | 773         | 207         | 293         | 142         | 131        | <0.001 |
| <b>Basic, n(%)</b>                                                     | 407 (52.7%) | 133 (64.3%) | 137 (46.8%) | 64 (45.1%)  | 73 (55.7%) |        |
| <b>Advanced, n(%)</b>                                                  | 316 (40.9%) | 64 (30.9%)  | 146 (49.8%) | 64 (45.1%)  | 42 (32.1%) |        |
| <b>Native, n(%)</b>                                                    | 50 (6.5%)   | 10 (4.8%)   | 10 (3.4%)   | 14 (9.9%)   | 16 (12.2%) |        |
| <b>Do you feel comfortable taking a course in English?</b>             | 798         | 212         | 297         | 148         | 141        | <0.001 |
| <b>Yes, n(%)</b>                                                       | 457 (57.3%) | 111 (52.4%) | 197 (66.3%) | 81 (54.7%)  | 68 (48.2%) |        |
| <b>Don't know, n(%)</b>                                                | 154 (19.3%) | 43 (20.3%)  | 55 (18.5%)  | 28 (18.9%)  | 28 (19.9%) |        |
| <b>No, n(%)</b>                                                        | 187 (23.4%) | 58 (27.4%)  | 45 (15.2%)  | 39 (26.4%)  | 45 (31.9%) |        |
| <b>Profession (Multiple Choice Question)</b>                           | 1007        | 259         | 367         | 194         | 187        |        |
| <b>Bio/Clinical Statistician, n(%)</b>                                 | 2 (0.2%)    | 1 (0.4%)    | 0           | 0           | 1 (0.5%)   | 0.459  |
| <b>Dietitian/Nutrition Scientist, n(%)</b>                             | 7 (0.7%)    | 2 (0.8%)    | 0           | 0           | 5 (2.7%)   | 0.003  |
| <b>Epidemiologist/Public Health Specialist, n(%)</b>                   | 4 (0.4%)    | 0           | 1 (0.3%)    | 0           | 3 (1.6%)   | 0.035  |
| <b>Movement Scientist, n(%)</b>                                        | 6 (0.6%)    | 0           | 0           | 0           | 6 (3.2%)   | <0.001 |
| <b>Nurse/Nurse Practitioner/Specialist Nurse/Pediatric Nurse, n(%)</b> | 248 (25.0%) | 248 (95.8%) | 0           | 0           | 0          | <0.001 |
| <b>Occupational Therapist, n(%)</b>                                    | 189 (18.8%) | 0           | 1 (0.3%)    | 188 (96.9%) | 0          | <0.001 |
| <b>Pharmacist, n(%)</b>                                                | 2 (0.2%)    | 0           | 0           | 0           | 2 (1.1%)   | 0.035  |
| <b>Physical Therapist/Physiotherapist, n(%)</b>                        | 350 (34.8%) | 0           | 350 (95.4%) | 0           | 0          | <0.001 |

|                                                                                                 |             |             |             |            |            |        |
|-------------------------------------------------------------------------------------------------|-------------|-------------|-------------|------------|------------|--------|
| <b>Physician Assistant, n(%)</b>                                                                | 38 (3.8%)   | 2 (0.8%)    | 0           | 0          | 36 (19.3%) | <0.001 |
| <b>Podiatrist, n(%)</b>                                                                         | 19 (1.9%)   | 0           | 1 (0.3%)    | 0          | 18 (9.6%)  | <0.001 |
| <b>Psychologist, n(%)</b>                                                                       | 15 (1.5%)   | 0           | 1 (0.3%)    | 0          | 14 (7.5%)  | <0.001 |
| <b>Social Worker, n(%)</b>                                                                      | 3 (0.3%)    | 0           | 0           | 0          | 3 (1.6%)   | 0.005  |
| <b>Other, n(%)</b>                                                                              | 124 (12.3%) | 6 (2.3%)    | 13 (3.5%)   | 6 (3.1%)   | 99 (52.9%) | <0.001 |
| <b>Working Situation (Multiple Choice Question)</b>                                             | 1145        | 261         | 434         | 219        | 231        |        |
| <b>Hospital, n(%)</b>                                                                           | 291 (25.4%) | 138 (55.9%) | 48 (11.1%)  | 45 (20.5%) | 60 (26.0%) | <0.001 |
| <b>University Hospital, n(%)</b>                                                                | 156 (13.6%) | 67 (25.7%)  | 34 (7.8%)   | 27 (12.3%) | 28 (12.1%) | <0.001 |
| <b>NGO, n(%)</b>                                                                                | 14 (1.2%)   | 2 (0.8%)    | 3 (0.7%)    | 4 (1.8%)   | 5 (2.2%)   | 0.231  |
| <b>Private Practice/Primary Care, n(%)</b>                                                      | 304 (26.6%) | 19 (7.3%)   | 166 (38.2%) | 55 (25.1%) | 64 (27.7%) | <0.001 |
| <b>Research Institution, n(%)</b>                                                               | 30 (2.6%)   | 2 (0.8%)    | 16 (3.7%)   | 1 (0.5%)   | 11 (4.8%)  | 0.001  |
| <b>Rehabilitation Centre, n(%)</b>                                                              | 136 (11.9%) | 3 (1.1%)    | 79 (18.2%)  | 42 (19.2%) | 12 (5.2%)  | <0.001 |
| <b>University, n(%)</b>                                                                         | 60 (5.2%)   | 6 (2.3%)    | 29 (6.7%)   | 6 (2.7%)   | 19 (8.2%)  | 0.001  |
| <b>University of Applied Sciences, n(%)</b>                                                     | 25 (2.2%)   | 2 (0.8%)    | 8 (1.8%)    | 11 (5.0%)  | 4 (1.7%)   | 0.010  |
| <b>Home Office/Home work, n(%)</b>                                                              | 25 (2.2%)   | 2 (0.8%)    | 17 (3.9%)   | 0          | 6 (2.6%)   | 0.001  |
| <b>Other, n(%)</b>                                                                              | 104 (9.1%)  | 20 (7.7%)   | 34 (7.8%)   | 28 (12.8%) | 22 (9.5%)  | 0.110  |
| <b>Do you work in children's/youth's care?</b>                                                  | 998         | 250         | 350         | 188        | 210        |        |
| <b>Yes, n(%)</b>                                                                                | 85 (8.5%)   | 16 (6.4%)   | 10 (2.9%)   | 23 (12.2%) | 36 (17.1%) | <0.001 |
| <b>Is the working situation specialized for children's/youth's care? Yes, n(%)</b>              | 67 (83.8%)  | 15 (93.8%)  | 9 (90.0%)   | 19 (86.4%) | 24 (75.0%) | NA     |
| <b>How many children/youngsters were treated per week in the past 12 months? (sub question)</b> | 80          | 16          | 10          | 23         | 32         | <0.001 |
| <b>1-5, n(%)</b>                                                                                | 6 (7.5%)    | 1 (6.2%)    | 1 (10.0%)   | 2 (9.1%)   | 2 (6.2%)   |        |
| <b>6-20, n(%)</b>                                                                               | 31 (38.8%)  | 11 (68.8%)  | 2 (20.0%)   | 9 (40.9%)  | 9 (28.1%)  |        |
| <b>More than 20, n(%)</b>                                                                       | 43 (53.8%)  | 4 (25.0%)   | 7 (70.0%)   | 11 (50.0%) | 21 (65.6%) |        |
| <b>Country</b>                                                                                  | 998         | 250         | 348         | 188        | 210        | <0.001 |
| <b>Andorra, n(%)</b>                                                                            | 1 (0.1%)    | 0           | 0           | 1 (0.5%)   | 0          |        |
| <b>Austria, n(%)</b>                                                                            | 103 (10.3%) | 13 (5.2%)   | 21 (6.0%)   | 53 (28.2%) | 16 (7.6%)  |        |

|                                     |             |            |             |            |            |
|-------------------------------------|-------------|------------|-------------|------------|------------|
| <b>Belgium, n(%)</b>                | 20 (2.0%)   | 15 (6.0%)  | 2 (0.6%)    | 2 (1.1%)   | 1 (0.5%)   |
| <b>Bosnia and Herzegovina, n(%)</b> | 23 (2.3%)   | 0          | 2 (0.6%)    | 21 (11.2%) | 0          |
| <b>Croatia, n(%)</b>                | 2 (0.2%)    | 1 (0.4%)   | 0           | 0          | 1 (0.5%)   |
| <b>Cyprus, n(%)</b>                 | 2 (0.2%)    | 0          | 2 (0.6%)    | 0          | 0          |
| <b>Czechia, n(%)</b>                | 19 (1.9%)   | 7 (2.8%)   | 4 (1.1%)    | 1 (0.5%)   | 7 (3.3%)   |
| <b>Denmark, n(%)</b>                | 70 (7.0%)   | 44 (17.6%) | 14 (4.0%)   | 4 (2.1%)   | 8 (3.8%)   |
| <b>Estonia, n(%)</b>                | 19 (1.9%)   | 11 (4.4%)  | 2 (0.6%)    | 6 (3.2%)   | 0          |
| <b>Finland, n(%)</b>                | 24 (2.4%)   | 15 (6.0%)  | 0           | 6 (3.2%)   | 3 (1.4%)   |
| <b>France, n(%)</b>                 | 62 (6.2%)   | 2 (0.8%)   | 14 (4.0%)   | 6 (3.2%)   | 40 (19.0%) |
| <b>Germany, n(%)</b>                | 53 (5.3%)   | 7 (2.8%)   | 10 (2.9%)   | 4 (2.1%)   | 32 (15.2%) |
| <b>Greece, n(%)</b>                 | 29 (2.9%)   | 0          | 3 (0.9%)    | 24 (12.8%) | 2 (1.0%)   |
| <b>Hungary, n(%)</b>                | 25 (2.5%)   | 12 (4.8%)  | 4 (1.1%)    | 0          | 9 (4.3%)   |
| <b>Ireland, n(%)</b>                | 1 (0.1%)    | 0          | 1 (0.3%)    | 0          | 0          |
| <b>Italy, n(%)</b>                  | 121 (12.1%) | 0          | 119 (34.0%) | 0          | 2 (1.0%)   |
| <b>Kazakhstan, n(%)</b>             | 1 (0.1%)    | 0          | 0           | 0          | 1 (0.5%)   |
| <b>Monaco, n(%)</b>                 | 1 (0.1%)    | 0          | 0           | 0          | 1 (0.5%)   |
| <b>Netherlands, n(%)</b>            | 84 (8.4%)   | 26 (10.4%) | 39 (11.1%)  | 6 (3.2%)   | 13 (6.2%)  |
| <b>Norway, n(%)</b>                 | 14 (1.4%)   | 7 (2.8%)   | 4 (1.1%)    | 2 (1.1%)   | 1 (0.5%)   |
| <b>Poland, n(%)</b>                 | 1 (0.1%)    | 0          | 0           | 0          | 1 (0.5%)   |
| <b>Portugal, n(%)</b>               | 89 (8.9%)   | 48 (19.2%) | 10 (2.9%)   | 18 (9.6%)  | 13 (6.2%)  |
| <b>Romania, n(%)</b>                | 3 (0.3%)    | 0          | 1 (0.3%)    | 0          | 2 (1.0%)   |
| <b>Russia, n(%)</b>                 | 9 (0.9%)    | 1 (0.4%)   | 0           | 0          | 8 (3.8%)   |
| <b>Serbia, n(%)</b>                 | 1 (0.1%)    | 1 (0.4%)   | 0           | 0          | 0          |
| <b>Slovenia, n(%)</b>               | 55 (5.5%)   | 6 (2.4%)   | 43 (12.3%)  | 4 (2.1%)   | 2 (1.0%)   |
| <b>Spain, n(%)</b>                  | 30 (3.0%)   | 17 (6.8%)  | 1 (0.3%)    | 0          | 12 (5.7%)  |

---

|                                                                     |           |           |           |            |           |
|---------------------------------------------------------------------|-----------|-----------|-----------|------------|-----------|
| <b>Sweden, n(%)</b>                                                 | 21 (2.1%) | 1 (0.4%)  | 9 (2.6%)  | 10 (5.3%)  | 1 (0.5%)  |
| <b>Switzerland, n(%)</b>                                            | 70 (7.0%) | 13 (5.2%) | 28 (8.0%) | 19 (10.1%) | 10 (4.8%) |
| <b>Turkey, n(%)</b>                                                 | 13 (1.3%) | 0         | 12 (3.4%) | 0          | 1 (0.5%)  |
| <b>Ukraine, n(%)</b>                                                | 5 (0.5%)  | 0         | 0         | 0          | 5 (2.4%)  |
| <b>United Kingdom, n(%)</b>                                         | 22 (2.2%) | 2 (0.8%)  | 3 (0.9%)  | 1 (0.5%)   | 16 (7.6%) |
| <b>Other (Algeria, Brazil, India, Martinique, and Mexico), n(%)</b> | 5 (0.5%)  | 1 (0.4%)  | 2 (0.6%)  | 0          | 2 (1.0%)  |

---

**Table E: Educational needs.** Data are presented separately for the three largest professional groups (nurses, physiotherapists, and occupational therapists). Educational needs were asked on a Likert scale (1=no need, 5=large need) and reported using mean (SD) values. The highest values in each group of profession are marked in bold.

| Variables                                                                               | All HPR                            | Nurses                             | Physiotherapists                   | Occupational therapists            | Other Professions                  | p-value |
|-----------------------------------------------------------------------------------------|------------------------------------|------------------------------------|------------------------------------|------------------------------------|------------------------------------|---------|
| <b>Educational needs (in terms of clinical practice)</b>                                |                                    |                                    |                                    |                                    |                                    |         |
| Non-pharmacological treatment, scale of 1 to 5 mean ( $\pm$ SD)                         | 3.68 ( $\pm$ 1.14)                 | 3.61 ( $\pm$ 1.07)                 | <b>3.81 (<math>\pm</math>1.10)</b> | <b>3.74 (<math>\pm</math>1.14)</b> | <b>3.42 (<math>\pm</math>1.27)</b> | 0.010   |
| Pharmacological treatment, scale of 1 to 5 mean ( $\pm$ SD)                             | 3.14 ( $\pm$ 1.22)                 | 3.59 ( $\pm$ 1.02)                 | 3.17 ( $\pm$ 1.17)                 | 2.58 ( $\pm$ 1.28)                 | 2.98 ( $\pm$ 1.30)                 | <0.001  |
| Telehealth/eHealth, scale of 1 to 5 mean ( $\pm$ SD)                                    | 3.15 ( $\pm$ 1.30)                 | 3.34 ( $\pm$ 1.24)                 | 3.05 ( $\pm$ 1.32)                 | 3.06 ( $\pm$ 1.24)                 | 3.18 ( $\pm$ 1.38)                 | 0.090   |
| Assistive devices, scale of 1 to 5 mean ( $\pm$ SD)                                     | 3.16 ( $\pm$ 1.21)                 | 3.24 ( $\pm$ 1.20)                 | 3.09 ( $\pm$ 1.23)                 | 3.45 ( $\pm$ 1.11)                 | 2.89 ( $\pm$ 1.24)                 | 0.001   |
| Diagnostic assessments, scale of 1 to 5 mean ( $\pm$ SD)                                | 3.30 ( $\pm$ 1.27)                 | 3.37 ( $\pm$ 1.26)                 | 3.50 ( $\pm$ 1.17)                 | 3.09 ( $\pm$ 1.26)                 | 2.98 ( $\pm$ 1.40)                 | <0.001  |
| Practice organisation and management, scale of 1 to 5 mean ( $\pm$ SD)                  | 3.06 ( $\pm$ 1.32)                 | 3.20 ( $\pm$ 1.32)                 | 3.14 ( $\pm$ 1.28)                 | 2.89 ( $\pm$ 1.31)                 | 2.85 ( $\pm$ 1.39)                 | 0.044   |
| Evidence-based practice, scale of 1 to 5 mean ( $\pm$ SD)                               | 3.61 ( $\pm$ 1.18)                 | 3.59 ( $\pm$ 1.10)                 | <b>3.81 (<math>\pm</math>1.12)</b> | 3.69 ( $\pm$ 1.20)                 | 3.13 ( $\pm$ 1.27)                 | <0.001  |
| Personal professional development, scale of 1 to 5 mean ( $\pm$ SD)                     | <b>3.72 (<math>\pm</math>1.10)</b> | <b>3.73 (<math>\pm</math>1.08)</b> | <b>3.85 (<math>\pm</math>1.04)</b> | 3.66 ( $\pm$ 1.11)                 | 3.47 ( $\pm$ 1.20)                 | 0.013   |
| Communication skills, scale of 1 to 5 mean ( $\pm$ SD)                                  | 3.31 ( $\pm$ 1.25)                 | 3.42 ( $\pm$ 1.20)                 | 3.56 ( $\pm$ 1.20)                 | 3.06 ( $\pm$ 1.27)                 | 2.87 ( $\pm$ 1.25)                 | <0.001  |
| Preventive medicine, including lifestyle intervention, scale of 1 to 5 mean ( $\pm$ SD) | <b>3.71 (<math>\pm</math>1.12)</b> | <b>3.79 (<math>\pm</math>1.04)</b> | 3.75 ( $\pm$ 1.09)                 | <b>3.76 (<math>\pm</math>1.19)</b> | <b>3.43 (<math>\pm</math>1.19)</b> | 0.025   |
| <b>Overall mean</b>                                                                     | <b>3.38 (<math>\pm</math>0.27)</b> | <b>3.49 (<math>\pm</math>0.20)</b> | <b>3.47 (<math>\pm</math>0.33)</b> | <b>3.30 (<math>\pm</math>0.42)</b> | <b>3.12 (<math>\pm</math>0.24)</b> |         |
| <b>Educational needs (in terms of theoretical knowledge)</b>                            |                                    |                                    |                                    |                                    |                                    |         |
| Aetiology, scale of 1 to 5 mean ( $\pm$ SD)                                             | 3.31 ( $\pm$ 1.07)                 | 3.44 ( $\pm$ 1.03)                 | 3.30 ( $\pm$ 1.01)                 | 3.24 ( $\pm$ 1.14)                 | 3.22 ( $\pm$ 1.17)                 | 0.222   |
| Pathophysiology, scale of 1 to 5 mean ( $\pm$ SD)                                       | <b>3.46 (<math>\pm</math>1.06)</b> | <b>3.53 (<math>\pm</math>1.02)</b> | <b>3.47 (<math>\pm</math>1.03)</b> | <b>3.32 (<math>\pm</math>1.11)</b> | <b>3.46 (<math>\pm</math>1.14)</b> | 0.334   |
| Epidemiology, scale of 1 to 5 mean ( $\pm$ SD)                                          | 3.28 ( $\pm$ 1.04)                 | 3.42 ( $\pm$ 1.04)                 | 3.26 ( $\pm$ 0.99)                 | 3.16 ( $\pm$ 1.05)                 | 3.23 ( $\pm$ 1.10)                 | 0.150   |
| Clinical features, scale of 1 to 5 mean ( $\pm$ SD)                                     | <b>3.65 (<math>\pm</math>1.08)</b> | <b>3.62 (<math>\pm</math>1.03)</b> | <b>3.71 (<math>\pm</math>1.08)</b> | <b>3.61 (<math>\pm</math>1.06)</b> | <b>3.60 (<math>\pm</math>1.19)</b> | 0.661   |
| Research methods, scale of 1 to 5 mean ( $\pm$ SD)                                      | 3.24 ( $\pm$ 1.21)                 | 3.30 ( $\pm$ 1.23)                 | 3.36 ( $\pm$ 1.17)                 | 3.01 ( $\pm$ 1.19)                 | 3.12 ( $\pm$ 1.26)                 | 0.026   |
| Teach the teacher, scale of 1 to 5 mean ( $\pm$ SD)                                     | 3.19 ( $\pm$ 1.31)                 | 3.18 ( $\pm$ 1.31)                 | 3.32 ( $\pm$ 1.29)                 | 3.19 ( $\pm$ 1.31)                 | 2.90 ( $\pm$ 1.30)                 | 0.034   |

---

|                     |                     |                     |                     |                     |                     |
|---------------------|---------------------|---------------------|---------------------|---------------------|---------------------|
| <b>Overall mean</b> | <b>3.36 (±0.17)</b> | <b>3.42 (±0.16)</b> | <b>3.40 (±0.17)</b> | <b>3.25 (±0.20)</b> | <b>3.26 (±0.25)</b> |
|---------------------|---------------------|---------------------|---------------------|---------------------|---------------------|

---

**Table F: RMDs that should be addressed in the courses.** Data are presented separately for the three largest professional groups (nurses, physiotherapists, and occupational therapists). Educational needs were asked on a Likert scale (1=no importance, 5=high importance) and reported using mean (SD).

| Variables                                                                        | Nurses                             | Physiotherapists                   | Occupational therapists            | Other Professions                  | p-value |
|----------------------------------------------------------------------------------|------------------------------------|------------------------------------|------------------------------------|------------------------------------|---------|
| <b>RMDs that should be addressed in the courses</b>                              |                                    |                                    |                                    |                                    |         |
|                                                                                  |                                    |                                    | Adult Care                         |                                    |         |
| Inflammatory arthritis, scale of 1 to 5 mean ( $\pm$ SD)                         | <b>4.27 (<math>\pm</math>0.95)</b> | 4.17 ( $\pm$ 0.92)                 | <b>4.40 (<math>\pm</math>0.84)</b> | <b>4.37 (<math>\pm</math>0.83)</b> | 0.082   |
| Osteoarthritis, scale of 1 to 5 mean ( $\pm$ SD)                                 | 3.64 ( $\pm$ 1.16)                 | <b>4.23 (<math>\pm</math>0.95)</b> | <b>4.27 (<math>\pm</math>1.03)</b> | 3.76 ( $\pm$ 1.16)                 | <0.001  |
| Connective Tissue Diseases, scale of 1 to 5 mean ( $\pm$ SD)                     | <b>3.95 (<math>\pm</math>1.09)</b> | <b>3.66 (<math>\pm</math>1.08)</b> | 3.75 ( $\pm$ 1.13)                 | <b>4.08 (<math>\pm</math>1.00)</b> | 0.002   |
| Fibromyalgia/chronic widespread pain syndromes, scale of 1 to 5 mean ( $\pm$ SD) | 3.66 ( $\pm$ 1.16)                 | <b>4.23 (<math>\pm</math>1.05)</b> | 3.92 ( $\pm$ 1.11)                 | 3.72 ( $\pm$ 1.18)                 | <0.001  |
| Low Back Pain, scale of 1 to 5 mean ( $\pm$ SD)                                  | 3.58 ( $\pm$ 1.19)                 | 3.99 ( $\pm$ 1.19)                 | 3.65 ( $\pm$ 1.27)                 | 3.81 ( $\pm$ 1.20)                 | 0.003   |
| Osteoporosis, scale of 1 to 5 mean ( $\pm$ SD)                                   | 3.77 ( $\pm$ 1.18)                 | 3.84 ( $\pm$ 1.07)                 | 3.65 ( $\pm$ 1.11)                 | 3.70 ( $\pm$ 1.09)                 | 0.411   |
|                                                                                  |                                    |                                    | Paediatric Care                    |                                    |         |
| Pediatric autoinflammatory diseases, scale of 1 to 5 mean ( $\pm$ SD)            | <b>4.43 (<math>\pm</math>0.65)</b> | <b>3.86 (<math>\pm</math>1.07)</b> | <b>3.80 (<math>\pm</math>1.23)</b> | 4.07 ( $\pm$ 0.92)                 | 0.380   |
| Juvenile idiopathic arthritis (JIA), scale of 1 to 5 mean ( $\pm$ SD)            | 4.21 ( $\pm$ 0.97)                 | <b>3.86 (<math>\pm</math>1.07)</b> | <b>3.80 (<math>\pm</math>1.14)</b> | <b>4.14 (<math>\pm</math>0.86)</b> | 0.707   |
| Juvenile Dermatomyositis (JDM), scale of 1 to 5 mean ( $\pm$ SD)                 | 4.07 ( $\pm$ 0.92)                 | 3.71 ( $\pm$ 1.25)                 | 3.70 ( $\pm$ 1.16)                 | 3.93 ( $\pm$ 0.83)                 | 0.790   |
| Systemic Lupus Erythematosus (Juvenile), scale of 1 to 5 mean ( $\pm$ SD)        | 4.29 ( $\pm$ 0.73)                 | 3.43 ( $\pm$ 1.51)                 | 3.70 ( $\pm$ 1.34)                 | 3.93 ( $\pm$ 0.83)                 | 0.317   |
| Chronic pain, scale of 1 to 5 mean ( $\pm$ SD)                                   | <b>4.71 (<math>\pm</math>0.47)</b> | <b>4.57 (<math>\pm</math>0.53)</b> | <b>4.20 (<math>\pm</math>1.23)</b> | <b>4.43 (<math>\pm</math>0.94)</b> | 0.523   |
| <b>Overall mean</b>                                                              | <b>4.05 (<math>\pm</math>0.37)</b> | <b>3.96 (<math>\pm</math>0.32)</b> | <b>3.89 (<math>\pm</math>0.27)</b> | <b>3.99 (<math>\pm</math>0.25)</b> |         |



**Table G: Course organisations.** Data are presented separately for the three largest professional groups (nurses, physiotherapists, and occupational therapists); except for the filter questions, no mandatory questions were included in the survey. To clarify the number of responses per question, the number of valid answers is reported.

| Variables                                                                                   | All HPR     | Nurses      | Physiotherapists | Occupational therapists | Other Professions | p-value |
|---------------------------------------------------------------------------------------------|-------------|-------------|------------------|-------------------------|-------------------|---------|
| <b>Setting of courses HPR are interested in (Multiple Choice Question)</b>                  | 1198        | 332         | 427              | 236                     | 203               |         |
| Live (on site/face-to-face), n(%)                                                           | 463 (38.6%) | 121 (36.4%) | 187 (43.8%)      | 85 (36.0%)              | 70 (34.5%)        | 0.012   |
| Live (online), n(%)                                                                         | 300 (25.0%) | 81 (24.4%)  | 105 (24.6%)      | 60 (25.4%)              | 54 (26.6%)        | 0.918   |
| Recorded online (without time constraints), n(%)                                            | 338 (28.2%) | 102 (30.7%) | 102 (23.9%)      | 68 (28.8%)              | 66 (32.5%)        | 0.011   |
| Other, n(%)                                                                                 | 14 (1.2%)   | 4 (1.2%)    | 4 (0.9%)         | 4 (1.7%)                | 2 (1.0%)          | 0.800   |
| No preference, n(%)                                                                         | 83 (6.9%)   | 24 (7.2%)   | 29 (6.8%)        | 19 (8.1%)               | 11 (5.4%)         | 0.591   |
| <b>Length of course HPR are interested in (Multiple Choice Question)</b>                    | 857         | 225         | 326              | 158                     | 148               |         |
| One day or less, n(%)                                                                       | 195 (22.8%) | 64 (28.4%)  | 62 (19.0%)       | 32 (20.3%)              | 37 (25.0%)        | 0.090   |
| 1-2 days, n(%)                                                                              | 377 (44.0%) | 86 (38.2%)  | 153 (46.9%)      | 74 (46.8%)              | 64 (43.2%)        | 0.032   |
| 3-5 days, n(%)                                                                              | 149 (17.4%) | 33 (14.7%)  | 66 (20.2%)       | 25 (15.8%)              | 25 (16.9%)        | 0.146   |
| Other, n(%)                                                                                 | 21 (2.5%)   | 3 (1.3%)    | 9 (2.8%)         | 4 (2.5%)                | 5 (3.4%)          | 0.576   |
| No preference, n(%)                                                                         | 115 (13.4%) | 39 (17.3%)  | 36 (11.0%)       | 23 (14.6%)              | 17 (11.5%)        | 0.237   |
| <b>Language that HPR prefer (Multiple Choice Question)</b>                                  | 862         | 227         | 332              | 164                     | 139               |         |
| English, n(%)                                                                               | 226 (26.2%) | 48 (21.1%)  | 100 (30.1%)      | 40 (24.4%)              | 38 (27.3%)        | 0.019   |
| National language, n(%)                                                                     | 561 (65.1%) | 160 (70.5%) | 203 (61.1%)      | 109 (66.5%)             | 89 (64.0%)        | 0.140   |
| Other, n(%)                                                                                 | 30 (3.5%)   | 12 (5.3%)   | 11 (3.3%)        | 3 (1.8%)                | 4 (2.9%)          | 0.298   |
| No preference, n(%)                                                                         | 45 (5.2%)   | 7 (3.1%)    | 18 (5.4%)        | 12 (7.3%)               | 8 (5.8%)          | 0.283   |
| <b>Provider that HPR prefer (Multiple Choice Question)</b>                                  | 1175        | 310         | 438              | 222                     | 205               |         |
| Organised by ESOR/EULAR (online), n(%)                                                      | 220 (18.7%) | 55 (17.7%)  | 80 (18.3%)       | 41 (18.5%)              | 44 (21.5%)        | 0.589   |
| Organised by ESOR/EULAR (on site, in your country), n(%)                                    | 284 (24.2%) | 75 (24.2%)  | 106 (21.2%)      | 58 (26.1%)              | 45 (22.0%)        | 0.811   |
| Organised by ESOR/EULAR (on site, NOT in your country), n(%)                                | 49 (4.2%)   | 10 (3.2%)   | 21 (4.8%)        | 8 (3.6%)                | 10 (4.9%)         | 0.578   |
| Organised by national organisations, trained by ESOR/EULAR (online), n(%)                   | 161 (13.7%) | 39 (12.6%)  | 63 (14.4%)       | 24 (10.8%)              | 35 (17.1%)        | 0.137   |
| Organised by national organisations, trained by ESOR/EULAR (on site, in your country), n(%) | 198 (16.9%) | 58 (18.7%)  | 72 (16.4%)       | 34 (15.3%)              | 34 (1.6%)         | 0.742   |
| Other, n(%)                                                                                 | 3 (0.3%)    | 1 (0.3%)    | 2 (0.5%)         | 0                       | 0                 | 0.593   |
| No preference, n(%)                                                                         | 260 (22.1%) | 72 (23.2%)  | 94 (21.5%)       | 57 (25.7%)              | 37 (18.0%)        | 0.301   |
| <b>Discipline-specific and/or multidisciplinary courses</b>                                 | 700         | 190         | 258              | 134                     | 118               | 0.869   |
| Multidisciplinary: HPR from various professional backgrounds and rheumatologists, n(%)      | 267 (38.1%) | 82 (43.2%)  | 95 (36.8%)       | 49 (36.6%)              | 41 (34.7%)        |         |
| Multidisciplinary: HPR from various professional backgrounds, n(%)                          | 105 (15.0%) | 26 (13.7%)  | 39 (15.1%)       | 22 (16.4%)              | 18 (15.3%)        |         |

---

|                                  |             |            |            |            |            |
|----------------------------------|-------------|------------|------------|------------|------------|
| <b>Discipline-specific, n(%)</b> | 178 (25.4%) | 47 (24.7%) | 70 (27.1%) | 31 (23.1%) | 30 (25.4%) |
| <b>No preference, n(%)</b>       | 150 (21.4%) | 35 (18.4%) | 54 (20.9%) | 32 (23.9%) | 29 (24.6%) |

---

**Table H: Barriers to participating in educational offerings.** Data are presented separately for the three largest professional groups (nurses, physiotherapists, and occupational therapists). Educational needs were asked on a Likert scale (1=no barrier, 5=major barrier) and reported using mean (SD) values.

| Variables                                                                                                                                               | All HPR                            | Nurses                             | Physiotherapists                   | Occupational therapists            | Other Professions                  | p-value |
|---------------------------------------------------------------------------------------------------------------------------------------------------------|------------------------------------|------------------------------------|------------------------------------|------------------------------------|------------------------------------|---------|
| I am NOT aware of EULAR educational offerings, mean ( $\pm$ SD)                                                                                         | 3.30 ( $\pm$ 1.49)                 | 3.26 ( $\pm$ 1.44)                 | <b>3.48 (<math>\pm</math>1.45)</b> | <b>3.38 (<math>\pm</math>1.57)</b> | 2.85 ( $\pm$ 1.48)                 | 0.006   |
| I am NOT interested in EULAR educational offerings, mean ( $\pm$ SD)                                                                                    | 1.86 ( $\pm$ 1.13)                 | 1.93 ( $\pm$ 1.19)                 | 1.86 ( $\pm$ 1.06)                 | 1.85 ( $\pm$ 1.11)                 | 1.77 ( $\pm$ 1.22)                 | 0.821   |
| The costs for EULAR annual congress are too high (course, travel accommodation; congress fee HPR=185-265 Euro), mean ( $\pm$ SD)                        | 3.46 ( $\pm$ 1.34)                 | <b>3.88 (<math>\pm</math>1.24)</b> | 3.27 ( $\pm$ 1.34)                 | 3.27 ( $\pm$ 1.34)                 | <b>3.42 (<math>\pm</math>1.38)</b> | <0.001  |
| The costs for EULAR online course for HPR are too high (course fee 150-200 Euro), mean ( $\pm$ SD)                                                      | 3.29 ( $\pm$ 1.36)                 | <b>3.80 (<math>\pm</math>1.27)</b> | 3.04 ( $\pm$ 1.34)                 | 3.22 ( $\pm$ 1.34)                 | 3.12 ( $\pm$ 1.37)                 | <0.001  |
| Lack of time/getting no opportunity for EULAR online course at work, mean ( $\pm$ SD)                                                                   | <b>3.32 (<math>\pm</math>1.39)</b> | 3.53 ( $\pm$ 1.30)                 | 3.37 ( $\pm$ 1.39)                 | 3.06 ( $\pm$ 1.44)                 | 3.12 ( $\pm$ 1.43)                 | 0.015   |
| Lack of time for EULAR online course during free time/leisure time, mean ( $\pm$ SD)                                                                    | 3.04 ( $\pm$ 1.38)                 | 3.31 ( $\pm$ 1.41)                 | 2.97 ( $\pm$ 1.35)                 | 2.88 ( $\pm$ 1.34)                 | 2.94 ( $\pm$ 1.43)                 | 0.035   |
| Lack of support from rheumatologist(s) for participation in an EULAR online course, mean ( $\pm$ SD)                                                    | 2.55 ( $\pm$ 1.36)                 | 2.62 ( $\pm$ 1.39)                 | 2.65 ( $\pm$ 1.35)                 | 2.48 ( $\pm$ 1.33)                 | 2.21 ( $\pm$ 1.32)                 | 0.092   |
| Lack of support from managerial staff for EULAR online course, mean ( $\pm$ SD)                                                                         | 2.63 ( $\pm$ 1.43)                 | 2.98 ( $\pm$ 1.44)                 | 2.64 ( $\pm$ 1.47)                 | 2.43 ( $\pm$ 1.20)                 | 2.17 ( $\pm$ 1.43)                 | <0.001  |
| Lack of mastering the English language, mean ( $\pm$ SD)                                                                                                | 2.61 ( $\pm$ 1.49)                 | 2.87 ( $\pm$ 1.42)                 | 2.36 ( $\pm$ 1.46)                 | 2.41 ( $\pm$ 1.40)                 | 3.01 ( $\pm$ 1.66)                 | <0.001  |
| Unavailability of computers, laptops or tablets for online offerings, mean ( $\pm$ SD)                                                                  | 1.51 ( $\pm$ 0.99)                 | 1.74 ( $\pm$ 1.13)                 | 1.41 ( $\pm$ 0.91)                 | 1.34 ( $\pm$ 0.81)                 | 1.55 ( $\pm$ 1.06)                 | 0.004   |
| Lack of internet connection needed to follow the EULAR online course, mean ( $\pm$ SD)                                                                  | 1.50 ( $\pm$ 0.98)                 | 1.52 ( $\pm$ 0.93)                 | 1.37 ( $\pm$ 0.85)                 | 1.59 ( $\pm$ 1.04)                 | 1.70 ( $\pm$ 1.21)                 | 0.033   |
| Content of offerings does not match with the educational needs of HPR in my country, mean ( $\pm$ SD)                                                   | 2.29 ( $\pm$ 1.15)                 | 2.26 ( $\pm$ 1.08)                 | 2.25 ( $\pm$ 1.11)                 | 2.22 ( $\pm$ 1.21)                 | 2.49 ( $\pm$ 1.33)                 | 0.422   |
| The level of the ESOR offerings do not match with my knowledge (too low or too advanced courses), mean ( $\pm$ SD)                                      | 2.17 ( $\pm$ 1.09)                 | 2.30 ( $\pm$ 1.15)                 | 2.07 ( $\pm$ 1.05)                 | 2.06 ( $\pm$ 0.98)                 | 2.29 ( $\pm$ 1.13)                 | 0.183   |
| I do not know what the content of the offerings is, mean ( $\pm$ SD)                                                                                    | <b>3.51 (<math>\pm</math>1.50)</b> | 3.40 ( $\pm$ 1.52)                 | <b>3.56 (<math>\pm</math>1.47)</b> | <b>3.74 (<math>\pm</math>1.46)</b> | <b>3.34 (<math>\pm</math>1.59)</b> | 0.213   |
| Educational offerings are not accredited by the national professional organisation, mean ( $\pm$ SD)                                                    | 2.53 ( $\pm$ 1.49)                 | 2.64 ( $\pm$ 1.49)                 | 2.62 ( $\pm$ 1.47)                 | 2.29 ( $\pm$ 1.45)                 | 2.35 ( $\pm$ 1.54)                 | 0.243   |
| Lack of motivation; taking part in education has no expected benefit for an HPR in my country, e.g. due to lack of career perspective, mean ( $\pm$ SD) | 2.28 ( $\pm$ 1.32)                 | 2.35 ( $\pm$ 1.34)                 | 2.45 ( $\pm$ 1.36)                 | 2.09 ( $\pm$ 1.18)                 | 1.90 ( $\pm$ 1.22)                 | 0.005   |
| I can do the same offerings in my own country, therefore do not need offerings from EULAR, mean ( $\pm$ SD)                                             | 2.07 ( $\pm$ 1.18)                 | 2.11 ( $\pm$ 1.23)                 | 2.21 ( $\pm$ 1.22)                 | 2.14 ( $\pm$ 1.15)                 | 1.62 ( $\pm$ 0.96)                 | 0.006   |
| <b>Overall mean</b>                                                                                                                                     | <b>2.58 (<math>\pm</math>0.65)</b> | <b>2.74 (<math>\pm</math>0.72)</b> | <b>2.56 (<math>\pm</math>0.67)</b> | <b>2.50 (<math>\pm</math>0.67)</b> | <b>2.43 (<math>\pm</math>0.63)</b> |         |

**Table I: Feedback on EULAR.** Data are presented separately for the three largest professional groups (nurses, physiotherapists, and occupational therapists); except for the filter questions, no mandatory questions were included in the survey. To clarify the number of responses per question, the number of valid answers for each question was reported.

| Variables                                                                                   | All HPR     | Nurses      | Physiotherapists | Occupational therapists | Other Professions | p-value |
|---------------------------------------------------------------------------------------------|-------------|-------------|------------------|-------------------------|-------------------|---------|
| <b>Have you ever heard of EULAR?</b>                                                        | 655         | 177         | 241              | 126                     | 111               | <0.001  |
| Yes, n(%)                                                                                   | 419 (64.0%) | 153 (86.4%) | 131 (54.4%)      | 52 (41.3%)              | 83 (74.8%)        |         |
| I am not sure, n(%)                                                                         | 38 (5.8%)   | 7 (4.0%)    | 19 (7.9%)        | 9 (7.1%)                | 3 (2.7%)          |         |
| No, n(%)                                                                                    | 198 (30.2%) | 17 (9.6%)   | 91 (37.8%)       | 65 (51.6%)              | 25 (22.5%)        |         |
| <b>Are you aware of EULAR HPR travel/training bursaries?</b>                                | 655         | 175         | 242              | 126                     | 112               | <0.001  |
| Yes, n(%)                                                                                   | 129 (19.7%) | 46 (26.3%)  | 41 (16.9%)       | 12 (9.5%)               | 30 (26.8%)        |         |
| I am not sure, n(%)                                                                         | 53 (8.1%)   | 24 (13.7%)  | 11 (4.5%)        | 7 (5.6%)                | 11 (9.8%)         |         |
| No, n(%)                                                                                    | 473 (72.2%) | 105 (60.0%) | 190 (78.5%)      | 107 (84.9%)             | 71 (63.4%)        |         |
| <b>Are you aware of "Teach the Teacher Course" offered by EULAR School of Rheumatology?</b> | 658         | 178         | 242              | 127                     | 111               | 0.058   |
| Yes, n(%)                                                                                   | 52 (7.9%)   | 21 (11.8%)  | 15 (6.2%)        | 8 (6.3%)                | 8 (7.2%)          |         |
| I am not sure, n(%)                                                                         | 40 (6.1%)   | 15 (8.4%)   | 11 (4.5%)        | 4 (3.1%)                | 10 (9.0%)         |         |
| No, n(%)                                                                                    | 566 (86.0%) | 142 (79.8%) | 216 (89.3%)      | 115 (90.6%)             | 93 (83.8%)        |         |
| <b>Have you ever heard of the EULAR School of Rheumatology?</b>                             | 657         | 176         | 241              | 127                     | 113               | <0.001  |
| Yes, n(%)                                                                                   | 205 (31.2%) | 63 (35.8%)  | 77 (32.0%)       | 23 (18.1%)              | 42 (37.2%)        |         |
| I am not sure, n(%)                                                                         | 69 (10.5%)  | 28 (15.9%)  | 18 (7.5%)        | 12 (9.4%)               | 11 (9.7%)         |         |
| No, n(%)                                                                                    | 383 (58.3%) | 85 (48.3%)  | 146 (60.6%)      | 92 (72.4%)              | 60 (53.1%)        |         |
| <b>Are you aware of courses offered by the EULAR School of Rheumatology? (sub question)</b> | 205         | 63          | 77               | 23                      | 42                | 0.586   |
| Yes, n(%)                                                                                   | 105 (51.2%) | 38 (60.3%)  | 35 (45.5%)       | 10 (43.5%)              | 22 (52.4%)        |         |
| I am not sure, n(%)                                                                         | 32 (15.6%)  | 6 (9.5%)    | 15 (19.5%)       | 4 (17.4%)               | 7 (16.7%)         |         |
| No, n(%)                                                                                    | 68 (33.2%)  | 19 (30.2%)  | 27 (35.1%)       | 9 (39.1%)               | 13 (31.0%)        |         |

|                                                                                                                                                   |             |             |             |             |            |        |
|---------------------------------------------------------------------------------------------------------------------------------------------------|-------------|-------------|-------------|-------------|------------|--------|
| <b>How did you hear about EULAR School of Rheumatology? (Multiple Choice Question, sub question)</b>                                              | 228         | 85          | 78          | 20          | 45         |        |
| Conference/EULAR annual congress, n(%)                                                                                                            | 76 (33.3%)  | 29 (34.1%)  | 22 (28.2%)  | 9 (45.0%)   | 16 (35.6%) | 0.036  |
| Newsletter, n(%)                                                                                                                                  | 39 (17.1%)  | 14 (16.5%)  | 14 (17.9%)  | 2 (10.0%)   | 9 (20.0%)  | 0.096  |
| Social media, n(%)                                                                                                                                | 23 (10.1%)  | 7 (8.2%)    | 10 (12.8%)  | 1 (5.0%)    | 5 (11.1%)  | 0.328  |
| Website, n(%)                                                                                                                                     | 84 (36.8%)  | 34 (40.0%)  | 29 (37.2%)  | 7 (35.0%)   | 14 (31.1%) | 0.005  |
| Other, n(%)                                                                                                                                       | 0           | 0           | 0           | 0           | 0          | NA     |
| I am not sure, n(%)                                                                                                                               | 6 (2.6%)    | 1 (1.2%)    | 3 (3.8%)    | 1 (5.0%)    | 1 (2.2%)   | 0.906  |
| <b>Have you ever attended one of the EULAR School of Rheumatology courses? (sub question)</b>                                                     | 104         | 38          | 35          | 10          | 21         | 0.539  |
| Yes, n(%)                                                                                                                                         | 56 (53.8%)  | 23 (60.5%)  | 19 (54.3%)  | 6 (60.0%)   | 8 (38.1%)  |        |
| I am not sure, n(%)                                                                                                                               | 1 (1.0%)    | 1 (2.6%)    | 0           | 0           | 0          |        |
| No, n(%)                                                                                                                                          | 47 (45.2%)  | 14 (36.8%)  | 16 (45.7%)  | 4 (40.0%)   | 13 (61.9%) |        |
| <b>Have you ever visited the EULAR/EULAR School of Rheumatology communication platforms? (website, social media, newsletter, conference, ...)</b> | 661         | 179         | 243         | 127         | 112        | <0.001 |
| Yes, n(%)                                                                                                                                         | 193 (29.2%) | 69 (38.5%)  | 64 (26.3%)  | 25 (19.7%)  | 35 (31.2%) |        |
| I am not sure, n(%)                                                                                                                               | 54 (8.2%)   | 21 (11.7%)  | 12 (4.9%)   | 9 (7.1%)    | 12 (10.7%) |        |
| No, n(%)                                                                                                                                          | 414 (62.6%) | 89 (49.7%)  | 167 (68.7%) | 93 (73.2%)  | 65 (58.0%) |        |
| <b>Have you ever participated in a EULAR annual congress meeting?</b>                                                                             | 661         | 179         | 243         | 127         | 112        | <0.001 |
| Yes, n(%)                                                                                                                                         | 154 (23.3%) | 65 (36.3%)  | 41 (16.9%)  | 16 (12.6%)  | 32 (28.6%) |        |
| I am not sure, n(%)                                                                                                                               | 11 (1.7%)   | 3 (1.7%)    | 4 (1.6%)    | 0           | 4 (3.6%)   |        |
| No, n(%)                                                                                                                                          | 496 (75.0%) | 111 (62.0%) | 198 (81.5%) | 111 (87.4%) | 76 (67.9%) |        |
| <b>How often did you participate in a EULAR annual congress meeting? (sub question)</b>                                                           | 154         | 64          | 41          | 16          | 33         | 0.617  |
| 1-2 time(s), n(%)                                                                                                                                 | 82 (53.2%)  | 36 (56.3%)  | 25 (61.0%)  | 8 (50.0%)   | 13 (39.4%) |        |
| 3-5 times, n(%)                                                                                                                                   | 33 (21.4%)  | 13 (20.3%)  | 6 (14.6%)   | 4 (25.0%)   | 10 (30.3%) |        |
| More than 5 times, n(%)                                                                                                                           | 39 (25.3%)  | 15 (23.4%)  | 10 (24.4%)  | 4 (25.0%)   | 10 (30.3%) |        |
| <b>How much money could be spent on your participation in EULAR annual congress meeting (travel, accommodation, and congress fee)?</b>            | 607         | 159         | 235         | 113         | 100        | 0.851  |
| Up to a maximum of 500 €, n(%)                                                                                                                    | 505 (83.2%) | 135 (84.9%) | 193 (82.1%) | 95 (84.1%)  | 82 (82.0%) |        |

|                                                                                                                                                                                                       |                |                |                |                |                |       |
|-------------------------------------------------------------------------------------------------------------------------------------------------------------------------------------------------------|----------------|----------------|----------------|----------------|----------------|-------|
| <b>500 € up to 1000 €, n(%)</b>                                                                                                                                                                       | 85 (14.0%)     | 21 (13.2%)     | 36 (15.3%)     | 13 (11.5%)     | 15 (15.0%)     |       |
| <b>More than 1000 €, n(%)</b>                                                                                                                                                                         | 17 (2.8%)      | 3 (1.9%)       | 6 (2.6%)       | 5 (4.4%)       | 3 (3.0%)       |       |
| <b>To what extent are you interested in a free subscription to the Journal Annals of the rheumatic diseases, that comes with the registration to the annual EULAR congress? VAS 0-100, mean (±SD)</b> | 57.09 (±27.78) | 59.91 (±28.23) | 56.33 (±26.72) | 57.57 (±27.11) | 53.63 (±30.08) | 0.430 |
